# Supplementary material for: Pendant orientation and its influence on the formation of hydrogen-bonded thiacalixarene nanotubes
Source: Royal Society of Chemistry journal article supplement (doi:10.1039/c0ce00129e), 2010-09-08
Supplement: c0ce00129e.pdf [file c0ce00129e.pdf]

Supporting information of

**Pendant orientation and its influence on the formation of hydrogen-bonded thiacalixarene nanotubes**

Yan Li, Weiping Yang, Yuanyin Chen and Shuling Gong\*

*College of Chemistry and Molecular Sciences, Wuhan University, Wuhan 430072, PR China. Fax: +86 27 68754067; Tel: +86 27 68752701; E-mail: [gongsl@whu.edu.cn](mailto:gongsl@whu.edu.cn).*

Figure S1: The propagated chain system of **5** along [101] direction.;

Figure S2: The propagated chain system of **5** perpendicular to (101) plane;

Table S3: Hydrogen bonds of compound **1**;

Table S4: Hydrogen bonds of compound **2**;

Table S5: Hydrogen bonds of compound **3**;

Table S6: Hydrogen bonds of compound **4**;

Table S7: Hydrogen bonds of compound **5**;

Figure S1. The propagated chain system of **5** along  $[101]$  direction. Hydrogen-bonded interactions are shown as broken lines. The hydrogen atoms connected to carbon atom are omitted for clarity.

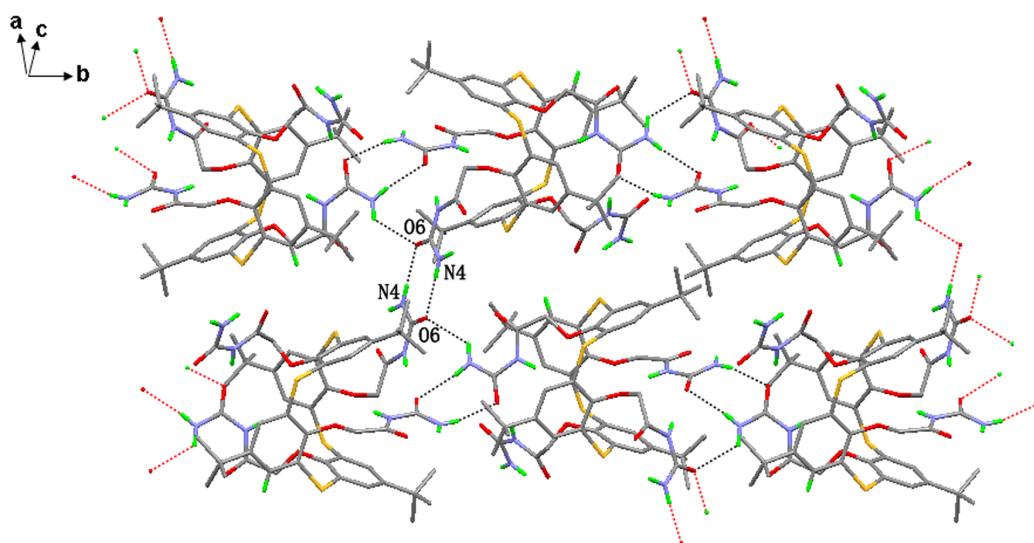

Figure S2. The propagated chain system of **5** perpendicular to  $(101)$  plane. Hydrogen-bonded interactions are shown as broken lines. The hydrogen atoms connected to carbon atom are omitted for clarity.

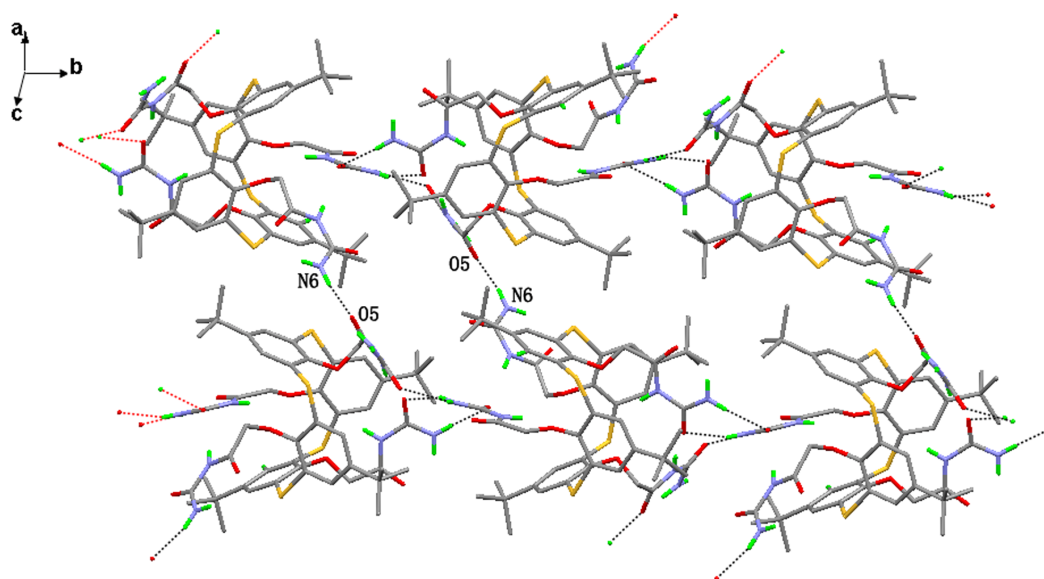

Table S3. Hydrogen bonds of compound **1** [ $\text{\AA}$  and  $^\circ$ ].

| D-H...A                | d(D-H) | d(H...A) | d(D...A)  | $\angle(\text{DHA})$ |
|------------------------|--------|----------|-----------|----------------------|
| O(18)-H(18A)...O(15)   | 0.84   | 1.89     | 2.713(7)  | 166.3                |
| O(14)-H(14B)...O(4)    | 0.82   | 2.36     | 2.909(4)  | 124.6                |
| O(14)-H(14A)...O(5)    | 0.82   | 1.84     | 2.641(5)  | 166.7                |
| O(13)-H(13B)...O(2)    | 0.82   | 2.10     | 2.751(4)  | 136.7                |
| O(13)-H(13B)...O(1)    | 0.82   | 2.25     | 2.948(4)  | 142.9                |
| O(13)-H(13A)...O(7)    | 0.82   | 2.22     | 2.799(4)  | 128.1                |
| O(11)-H(11)...O(14)    | 0.84   | 1.87     | 2.641(5)  | 152.9                |
| O(9)-H(9)...O(13)      | 0.84   | 1.78     | 2.554(4)  | 152.9                |
| O(6)-H(6)...O(17)      | 0.84   | 1.78     | 2.563(7)  | 153.6                |
| O(16)-H(16A)...O(16)#1 | 0.84   | 1.80     | 2.40(3)   | 127.8                |
| O(16)-H(16A)...O(12)#1 | 0.84   | 2.10     | 2.728(15) | 131.8                |
| O(15)-H(15)...O(8)#2   | 0.84   | 1.91     | 2.745(6)  | 177.7                |
| O(3)-H(3)...O(18)#3    | 0.84   | 1.74     | 2.552(5)  | 161.4                |
| C(22)-H(22A)...O(3)#4  | 0.98   | 2.60     | 3.236(6)  | 123.1                |

Symmetry transformations used to generate equivalent atoms:

#1  $-x+2, -y+1, -z+1$  #2  $x-1, y-1, z$  #3  $x, y+1, z$  #4  $x+1, y, z$ Table S4. Hydrogen bonds of compound **2** [ $\text{\AA}$  and  $^\circ$ ].

| D-H...A               | d(D-H) | d(H...A) | d(D...A) | $\angle(\text{DHA})$ |
|-----------------------|--------|----------|----------|----------------------|
| N(1)-H(1)...S(2)      | 0.86   | 2.64     | 3.425(3) | 153.0                |
| N(1)-H(1)...O(7)      | 0.86   | 2.27     | 2.712(3) | 112.0                |
| N(2)-H(2)...O(1)      | 0.86   | 2.19     | 2.627(3) | 112.0                |
| N(3)-H(3A)...O(12)#1  | 0.86   | 2.20     | 3.013(3) | 158.0                |
| N(3)-H(3B)...O(8)     | 0.86   | 2.06     | 2.705(3) | 132.0                |
| N(4)-H(4A)...O(3)#2   | 0.86   | 2.28     | 3.091(4) | 157.0                |
| N(4)-H(4B)...O(2)     | 0.86   | 2.06     | 2.705(4) | 132.0                |
| N(4)-H(4B)...O(8)#2   | 0.86   | 2.51     | 2.961(4) | 114.0                |
| O(5)-H(5A)...O(4)     | 0.82   | 2.06     | 2.578(3) | 121.0                |
| O(5)-H(5A)...O(10)    | 0.82   | 2.45     | 2.923(4) | 118.0                |
| O(11)-H(11)...O(9)#3  | 0.82   | 1.83     | 2.622(3) | 163.0                |
| C(17)-H(17)...O(9)    | 0.93   | 2.57     | 3.459(4) | 161.0                |
| C(24)-H(24B)...O(6)#1 | 0.97   | 2.52     | 3.225(4) | 129.0                |
| C(36)-H(36A)...S(3)   | 0.97   | 2.64     | 3.139(3) | 112.0                |

|                     |      |      |          |       |
|---------------------|------|------|----------|-------|
| C(49)-H(49A)...S(3) | 0.97 | 2.67 | 3.350(3) | 127.0 |
|---------------------|------|------|----------|-------|

---

Symmetry transformations used to generate equivalent atoms:

#1 -x,1-y,-z      #2 -x,2-y,-z      #3 x,-1+y,z

Table S5. Hydrogen bonds of compound **3** [Å and °].

| D-H...A             | d(D-H) | d(H...A) | d(D...A) | <(DHA) |
|---------------------|--------|----------|----------|--------|
| N(1)-H(1)...O(3)#1  | 0.86   | 2.53     | 3.170(6) | 132.3  |
| N(1)-H(1)...O(4)    | 0.86   | 2.17     | 2.634(5) | 113.7  |
| O(3)-H(3A)...O(6)#1 | 0.82   | 1.74     | 2.557(5) | 170.6  |
| N(2)-H(2A)...O(2)#2 | 0.86   | 2.47     | 3.154(6) | 137.2  |
| N(2)-H(2B)...O(5)   | 0.86   | 2.03     | 2.679(7) | 131.5  |
| C(5)-H(5)...S(2)#3  | 0.93   | 2.85     | 3.750(5) | 163.0  |
| C(11)-H(11A)...S(1) | 0.97   | 2.85     | 3.429(6) | 119.5  |
| C(23)-H(23B)...S(2) | 0.97   | 2.86     | 3.395(8) | 115.4  |

---

Symmetry transformations used to generate equivalent atoms:

#1 -x+1,y,-z+1/2      #2 x-1/2,-y+1/2,z+1/2      #3 -x+1,y,-z+3/2

Table S6. Hydrogen bonds of compound **4** [Å and °].

| D-H...A              | d(D-H) | d(H...A) | d(D...A) | <(DHA) |
|----------------------|--------|----------|----------|--------|
| N(1)-H(1)...S(2)     | 0.86   | 2.68     | 3.485(3) | 156.0  |
| N(1)-H(1)...O(1)     | 0.86   | 2.30     | 2.727(4) | 111.0  |
| N(2)-H(2A)...O(9)#1  | 0.86   | 2.07     | 2.928(6) | 174.0  |
| N(2)-H(2B)...O(2)    | 0.86   | 2.06     | 2.701(7) | 131.0  |
| N(3)-H(3)...O(4)     | 0.86   | 2.24     | 2.668(6) | 111.0  |
| N(3)-H(3)...O(12)    | 0.86   | 2.53     | 3.109(8) | 126.0  |
| N(4)-H(4A)...O(11)#2 | 0.86   | 2.27     | 3.053(8) | 151.0  |
| N(4)-H(4B)...O(5)    | 0.86   | 2.02     | 2.656(7) | 131.0  |
| N(5)-H(5)...O(7)     | 0.86   | 2.16     | 2.618(4) | 113.0  |
| N(6)-H(6A)...O(3)#3  | 0.86   | 2.03     | 2.887(5) | 172.0  |
| N(6)-H(6B)...O(8)    | 0.86   | 1.99     | 2.661(6) | 134.0  |
| O(12)-H(12)...O(6)   | 0.82   | 1.71     | 2.504(8) | 163.0  |
| C(11)-H(11A)...S(1)  | 0.97   | 2.60     | 3.146(4) | 116.0  |
| C(11)-H(11B)...O(9)  | 0.97   | 2.56     | 3.093(7) | 115.0  |

|                     |      |      |           |       |
|---------------------|------|------|-----------|-------|
| C(34)-H(34A)...O(6) | 0.96 | 2.49 | 3.438(17) | 173.0 |
| C(50)-H(50B)...S(1) | 0.97 | 2.81 | 3.411(5)  | 121.0 |

Symmetry transformations used to generate equivalent atoms:

#1 1-y,x-y,z      #2 1-x+y,1-x,z      #3 -x+y,1-x,z

Table S7. Hydrogen bonds of compound **5** [ $\text{\AA}$  and  $^\circ$ ].

| D-H...A              | d(D-H) | d(H...A) | d(D...A) | $\angle(\text{DHA})$ |
|----------------------|--------|----------|----------|----------------------|
| N(1)-H(1A)...O(1)    | 0.85   | 2.15     | 2.607(3) | 113.2                |
| N(2)-H(2A)...O(2)    | 0.87   | 2.08     | 2.691(4) | 127.3                |
| N(2)-H(2A)...O(6)#1  | 0.87   | 2.38     | 2.974(3) | 125.3                |
| N(2)-H(2B)...O(12)#1 | 0.86   | 2.14     | 2.978(3) | 163.3                |
| N(3)-H(3A)...O(12)   | 0.85   | 2.04     | 2.862(3) | 164.3                |
| N(4)-H(4A)...O(5)    | 0.85   | 2.07     | 2.737(4) | 134.3                |
| N(4)-H(4B)...O(6)#1  | 0.85   | 2.09     | 2.942(4) | 172.3                |
| N(5)-H(5A)...O(3)    | 0.86   | 2.13     | 2.951(4) | 158.3                |
| N(6)-H(6A)...O(5)#2  | 0.88   | 2.14     | 2.976(5) | 159.3                |
| N(6)-H(6B)...O(8)    | 0.88   | 1.99     | 2.675(5) | 134.4                |
| N(7)-H(7A)...O(10)   | 0.87   | 2.27     | 2.654(3) | 107.2                |
| N(8)-H(8D)...O(3)#3  | 0.88   | 2.15     | 3.012(3) | 166.3                |
| N(8)-H(8E)...O(11)   | 0.85   | 1.99     | 2.663(4) | 136.3                |
| C(11)-H(11B)...S(1)  | 0.97   | 2.83     | 3.439(3) | 122.0                |
| C(24)-H(24A)...O(12) | 0.97   | 2.44     | 3.082(3) | 123.0                |
| C(24)-H(24B)...S(2)  | 0.97   | 2.77     | 3.358(3) | 120.0                |
| C(32)-H(32)...O(6)   | 0.93   | 2.57     | 3.479(3) | 165.0                |
| C(37)-H(37A)...S(3)  | 0.97   | 2.76     | 3.363(3) | 121.0                |
| C(37)-H(37B)...O(3)  | 0.97   | 2.43     | 3.129(4) | 129.0                |

Symmetry transformations used to generate equivalent atoms:

#1  $1/2+x, 1/2-y, 1/2+z$       #2  $-1/2+x, 1/2-y, 1/2+z$       #3  $1/2-x, -1/2+y, 1/2-z$
